# Supplementary material for: Primary cervical screening with high risk human papillomavirus testing: observational study
Source: PubMed Central journal article supplement (PMC6364146; doi:10.1136/bmj.l240), 2019-02-06

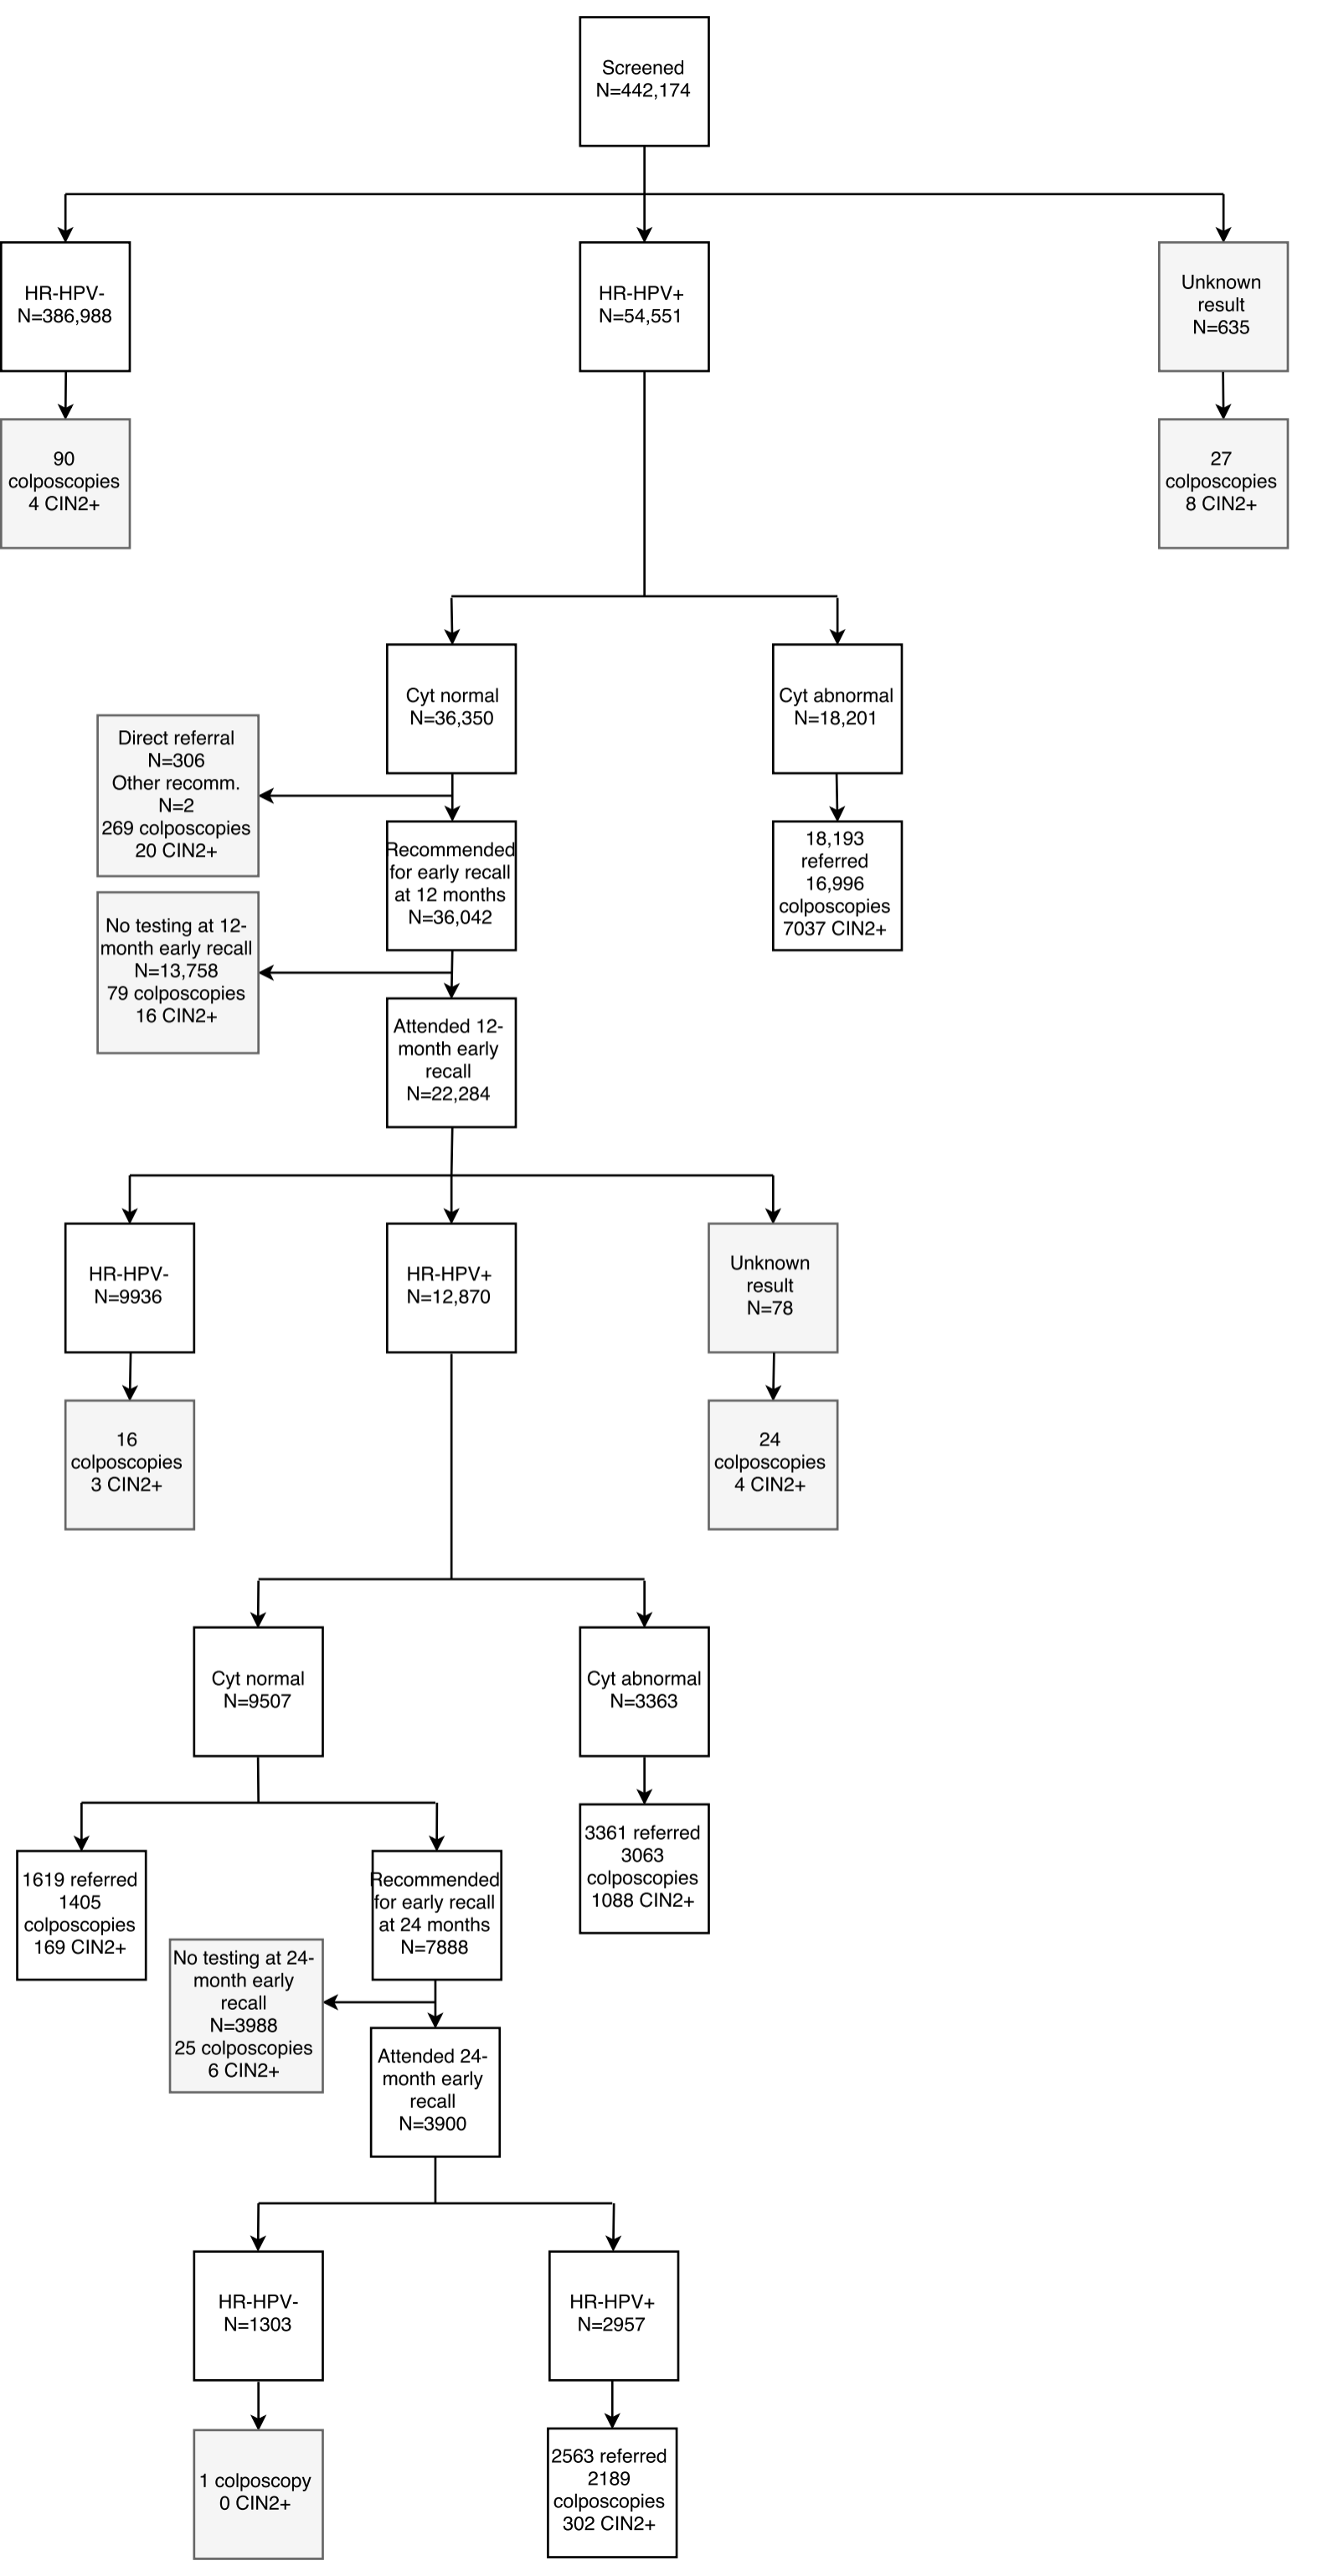

Supplement: rebn044972.ww4.pdf [file rebn044972.ww4.pdf]
